# Supplementary material
Source: PubMed Central journal article supplement (PMC6824529)
Supplement: wxx076_suppl_online_supplementary_material.pdf [file wxx076_suppl_online_supplementary_material.pdf]

**Occupational exposure to manganese and fine motor skills in elderly men:  
Results from the Heinz Nixdorf Recall Study**

Beate Pesch<sup>a\*</sup>, Swaantje Casjens<sup>a\*</sup>, Tobias Weiss<sup>a</sup>, Benjamin Kendzia<sup>a</sup>, Marina Arendt<sup>b</sup>, Lewin Eisele<sup>b</sup>, Thomas Behrens<sup>a</sup>, Nadin Ulrich<sup>a</sup>, Noreen Pundt<sup>b</sup>, Anja Marr<sup>b</sup>, Sibylle Robens<sup>a</sup>, Christoph van Thriel<sup>c</sup>, Rainer Van Gelder<sup>d</sup>, Michael Aschner<sup>e</sup>, Susanne Moebus<sup>b</sup>, Nico Dragano<sup>f</sup>, Thomas Brüning<sup>a\*</sup>, Karl-Heinz Jöckel<sup>b\*</sup>

<sup>a</sup> Institute for Prevention and Occupational Medicine of the German Social Accident Insurance, Institute of the Ruhr-Universität Bochum (IPA), Bochum, Germany

<sup>b</sup> Institute for Medical Informatics, Biometry and Epidemiology (IMIBE), University of Essen-Duisburg, Essen, Germany

<sup>c</sup> Leibniz Research Centre for Working Environment and Human Factors (IfADo), Dortmund, Germany

<sup>d</sup> Institute for Occupational Safety and Health of the German Social Accident Insurance (IFA), Sankt Augustin, Germany

<sup>e</sup> Department of Molecular Pharmacology, Albert Einstein College of Medicine, New York, NY, USA

<sup>f</sup> Institute for Medical Sociology, Medical Faculty, University of Düsseldorf, Düsseldorf, Germany

\* Equally contributed

**Corresponding author:**

Beate Pesch, PhD

Institute for Prevention and Occupational Medicine of the German Social Accident Insurance, Institute of the Ruhr-Universität Bochum (IPA)

44789 Bochum, Germany

Phone: +49-234-302 4536, e-mail: pesch@ipa-dguv.de

## **Table of Contents**

**Table S1.** Occupations rated as requiring fine motor skills.

**Table S2.** Occupation and other potential predictors of fine motor skills of the non-dominant hand in 1,232 men assessed with Poisson regression.

**Table S3.** Odds ratios for at-risk occupation and other factors on substantially impaired fine motor tests of the non-dominant hand in 1,232 men.

**Table S4.** Cumulative exposure to manganese and other predictors of fine motor skills of the non-dominant hand in 1,232 men assessed with Poisson regression.

**Table S5.** Odds ratios for cumulative Mn exposure, iron status, and other potential predictors of substantially impaired dexterity of the non-dominant hand in 860 men.

**Table S1.** Occupations rated as requiring fine motor skills.

---

| <b>Occupations</b>                 |
|------------------------------------|
| Architect                          |
| Confectioner (pastry cook)         |
| Conservator or restorer            |
| Craft glazier                      |
| Curtain/drapery sewer              |
| Dental technician                  |
| Dentist                            |
| Draftsman                          |
| Engraver                           |
| Garment maker                      |
| Landscape architect                |
| Laundry tailor                     |
| Leather sewer                      |
| Ophthalmic optics process mechanic |
| Oral surgeon                       |
| Painter and decorator              |
| Pattern maker                      |
| Polisher                           |
| Precision mechanic                 |
| Shoemaker                          |
| Stenotypist                        |
| Technical draftsman                |
| Watchmaker                         |

---

**Table S2.** Occupation and other potential predictors of fine motor skills of the non-dominant hand in 1,232 men assessed with Poisson regression.

| Variable           | Value                                                | n    | Tapping hits   |             |             | Line tracing errors |             |             | Steadiness errors |             |             | Aiming errors  |             |             |
|--------------------|------------------------------------------------------|------|----------------|-------------|-------------|---------------------|-------------|-------------|-------------------|-------------|-------------|----------------|-------------|-------------|
|                    |                                                      |      | Exp( $\beta$ ) | 95% CI      |             | Exp( $\beta$ )      | 95% CI      |             | Exp( $\beta$ )    | 95% CI      |             | Exp( $\beta$ ) | 95% CI      |             |
| Intercept          |                                                      | 1232 | 277            | 256         | 300         | 10.1                | 8.10        | 12.6        | 1.01              | 0.62        | 1.63        | 0.12           | 0.05        | 0.27        |
| Occupation         | Blue-collar without exposure to Mn (last occupation) | 237  | 1              |             |             | 1                   |             |             | 1                 |             |             | 1              |             |             |
|                    | Welders                                              | 24   | 0.99           | 0.93        | 1.05        | 0.95                | 0.81        | 1.10        | 0.69              | 0.46        | 1.03        | 0.86           | 0.47        | 1.58        |
|                    | Occasional welding                                   | 195  | 1.01           | 0.98        | 1.03        | 1.01                | 0.95        | 1.09        | 0.89              | 0.76        | 1.04        | <b>0.76</b>    | <b>0.57</b> | <b>0.99</b> |
|                    | Other potential exposure to Mn                       | 103  | <b>1.04</b>    | <b>1.00</b> | <b>1.07</b> | 0.98                | 0.90        | 1.06        | 0.94              | 0.78        | 1.13        | 0.94           | 0.69        | 1.28        |
|                    | Manually skilled                                     | 112  | 1.01           | 0.97        | 1.04        | 0.99                | 0.92        | 1.08        | 0.86              | 0.71        | 1.04        | 0.85           | 0.62        | 1.17        |
|                    | White-collar                                         | 561  | <b>1.03</b>    | <b>1.01</b> | <b>1.05</b> | 0.99                | 0.93        | 1.04        | 0.99              | 0.87        | 1.12        | 0.87           | 0.71        | 1.07        |
| Age [per 10 years] |                                                      | 1232 | <b>0.93</b>    | <b>0.92</b> | <b>0.94</b> | <b>1.16</b>         | <b>1.13</b> | <b>1.20</b> | <b>1.52</b>       | <b>1.43</b> | <b>1.63</b> | <b>1.28</b>    | <b>1.14</b> | <b>1.44</b> |
| Smoking status     | Never                                                | 367  | 1              |             |             | 1                   |             |             | 1                 |             |             | 1              |             |             |
|                    | Former                                               | 687  | 1.00           | 0.98        | 1.02        | 1.01                | 0.96        | 1.05        | 1.02              | 0.92        | 1.14        | 1.15           | 0.95        | 1.39        |
|                    | Current                                              | 178  | <b>0.97</b>    | <b>0.94</b> | <b>0.99</b> | 1.04                | 0.97        | 1.11        | <b>1.29</b>       | <b>1.11</b> | <b>1.49</b> | 1.20           | 0.92        | 1.57        |
| Test time [sec]    |                                                      | 1232 |                |             |             | <b>1.01</b>         | <b>1.00</b> | <b>1.01</b> |                   |             |             | <b>1.05</b>    | <b>1.03</b> | <b>1.07</b> |

**Table S3.** Odds ratios for at-risk occupation and other factors on substantially impaired fine motor tests of the non-dominant hand in 1,232 men.

| Variable           | Value                                                     | Tapping hits   |                 |                         | Line tracing errors |                         |                         | Steadiness errors |                 |                         | Aiming errors |                 |                         |
|--------------------|-----------------------------------------------------------|----------------|-----------------|-------------------------|---------------------|-------------------------|-------------------------|-------------------|-----------------|-------------------------|---------------|-----------------|-------------------------|
|                    |                                                           | n <sup>a</sup> | OR <sup>b</sup> | 95% CI                  | n                   | OR <sup>b</sup>         | 95% CI                  | n                 | OR <sup>b</sup> | 95% CI                  | n             | OR <sup>b</sup> | 95% CI                  |
| Occupation         | Blue-collar jobs without exposure to Mn (last occupation) | 28             | 1               |                         | 21                  | 1                       |                         | 29                | 1               |                         | 38            | 1               |                         |
|                    | Welders                                                   | 4              | 1.71            | 0.53 5.51               | 1                   | 0.48                    | 0.06 3.81               | 1                 | 0.35            | 0.05 2.69               | 3             | 0.77            | 0.22 2.74               |
|                    | Occasional welding                                        | 27             | 1.32            | 0.74 2.36               | 20                  | 1.26                    | 0.64 2.47               | 23                | 1.04            | 0.57 1.88               | 23            | 0.72            | 0.41 1.26               |
|                    | Other potential exposure to Mn                            | 12             | 0.88            | 0.42 1.84               | 18                  | 1.67                    | 0.81 3.46               | 14                | 1.02            | 0.51 2.07               | 13            | 0.73            | 0.37 1.45               |
|                    | Manually skilled occupations                              | 11             | 0.84            | 0.40 1.79               | 14                  | 1.44                    | 0.68 3.06               | 9                 | 0.64            | 0.29 1.43               | 14            | 0.77            | 0.40 1.49               |
|                    | White-collar occupations                                  | 46             | 0.74            | 0.44 1.23               | 54                  | 1.13                    | 0.65 1.97               | 51                | 0.79            | 0.48 1.30               | 77            | 0.90            | 0.59 1.38               |
| Age [per 10 years] |                                                           | 128            | <b>2.61</b>     | <b>1.97</b> <b>3.46</b> | 128                 | <b>2.73</b>             | <b>2.04</b> <b>3.65</b> | 127               | <b>2.51</b>     | <b>1.90</b> <b>3.31</b> | 168           | <b>1.45</b>     | <b>1.14</b> <b>1.85</b> |
| Smoking status     | Never                                                     | 35             | 1               |                         | 36                  | 1                       |                         | 34                | 1               |                         | 47            | 1               |                         |
|                    | Former                                                    | 71             | 1.03            | 0.66 1.60               | 70                  | 1.02                    | 0.65 1.59               | 70                | 1.01            | 0.65 1.57               | 95            | 1.08            | 0.74 1.58               |
|                    | Current                                                   | 22             | <b>1.90</b>     | <b>1.05</b> <b>3.45</b> | 22                  | <b>2.03</b>             | <b>1.10</b> <b>3.73</b> | 23                | <b>1.96</b>     | <b>1.09</b> <b>3.53</b> | 26            | 1.34            | 0.79 2.27               |
| Test time [sec]    |                                                           |                |                 | 128                     | <b>1.06</b>         | <b>1.04</b> <b>1.07</b> |                         |                   |                 | 168                     | 1.04          | 0.98 1.09       |                         |

<sup>a</sup>Participants at risk; <sup>b</sup>Odds ratio with 95% confidence interval (CI) for substantially impaired dexterity (hits <10<sup>th</sup> percentile, errors >90<sup>th</sup> percentile).

**Table S4.** Cumulative exposure to manganese and other predictors of fine motor skills of the non-dominant hand in 1,232 men assessed with Poisson regression.

| Variable                                                       | Value              | n    | Tapping hits   |             |             | Line tracing errors |             |             | Steadiness errors |             |             | Aiming errors  |             |             |
|----------------------------------------------------------------|--------------------|------|----------------|-------------|-------------|---------------------|-------------|-------------|-------------------|-------------|-------------|----------------|-------------|-------------|
|                                                                |                    |      | Exp( $\beta$ ) | 95% CI      |             | Exp( $\beta$ )      | 95% CI      |             | Exp( $\beta$ )    | 95% CI      |             | Exp( $\beta$ ) | 95% CI      |             |
| Intercept                                                      |                    | 1232 | 287            | 265         | 310         | 9.98                | 8.05        | 12.4        | 0.91              | 0.57        | 1.46        | 0.09           | 0.04        | 0.20        |
| Cumulative exposure to Mn<br>[ $\mu\text{g}/\text{m}^3$ years] | 0                  | 910  | 1              |             |             | 1                   |             |             | 1                 |             |             | 1              |             |             |
|                                                                | > 0 – 58.0         | 161  | 1.00           | 0.98        | 1.03        | 0.96                | 0.90        | 1.02        | <b>0.84</b>       | <b>0.73</b> | <b>0.98</b> | 0.79           | 0.61        | 1.03        |
|                                                                | > 58.0 – 184.8     | 81   | 1.02           | 0.99        | 1.05        | 1.03                | 0.95        | 1.12        | 0.85              | 0.70        | 1.03        | 0.84           | 0.60        | 1.18        |
|                                                                | > 184.8            | 80   | 0.98           | 0.95        | 1.01        | 1.05                | 0.97        | 1.14        | 1.02              | 0.85        | 1.22        | 1.02           | 0.76        | 1.38        |
| Occupational qualification                                     | University         | 350  | 1              |             |             | 1                   |             |             | 1                 |             |             | 1              |             |             |
|                                                                | Foremen/technician | 269  | 0.98           | 0.96        | 1.01        | 0.99                | 0.93        | 1.05        | 1.06              | 0.92        | 1.22        | 0.94           | 0.72        | 1.21        |
|                                                                | None/vocational    | 623  | <b>0.97</b>    | <b>0.96</b> | <b>0.99</b> | <b>1.05</b>         | <b>1.00</b> | <b>1.10</b> | <b>1.16</b>       | <b>1.04</b> | <b>1.30</b> | <b>1.43</b>    | <b>1.16</b> | <b>1.75</b> |
| Age [per 10 years]                                             |                    | 1232 | <b>0.93</b>    | <b>0.92</b> | <b>0.94</b> | <b>1.16</b>         | <b>1.13</b> | <b>1.20</b> | <b>1.52</b>       | <b>1.43</b> | <b>1.62</b> | <b>1.30</b>    | <b>1.16</b> | <b>1.46</b> |
| Smoking status                                                 | Never              | 367  | 1              |             |             | 1                   |             |             | 1                 |             |             | 1              |             |             |
|                                                                | Former             | 687  | 1.00           | 0.99        | 1.02        | 1.00                | 0.96        | 1.05        | 1.02              | 0.91        | 1.13        | 1.12           | 0.93        | 1.35        |
|                                                                | Current            | 178  | <b>0.97</b>    | <b>0.95</b> | <b>1.00</b> | 1.03                | 0.97        | 1.10        | <b>1.27</b>       | <b>1.10</b> | <b>1.48</b> | 1.15           | 0.89        | 1.50        |
| Test time [sec]                                                |                    | 1232 |                |             |             | <b>1.01</b>         | <b>1.00</b> | <b>1.01</b> |                   |             |             | <b>1.05</b>    | <b>1.02</b> | <b>1.07</b> |

**Table S5.** Odds ratios for cumulative Mn exposure, iron status, and other potential predictors of substantially impaired dexterity of the non-dominant hand in 860 men.

| Variable                                               | Value                              | Tapping hits   |                 |                         | Line tracing errors |                 |                         | Steadiness errors |                 |                         | Aiming errors  |                 |                         |
|--------------------------------------------------------|------------------------------------|----------------|-----------------|-------------------------|---------------------|-----------------|-------------------------|-------------------|-----------------|-------------------------|----------------|-----------------|-------------------------|
|                                                        |                                    | n <sup>a</sup> | OR <sup>b</sup> | 95% CI                  | n <sup>a</sup>      | OR <sup>b</sup> | 95% CI                  | n <sup>a</sup>    | OR <sup>b</sup> | 95% CI                  | n <sup>a</sup> | OR <sup>b</sup> | 95% CI                  |
| Cumulative exposure to Mn<br>[µg/m <sup>3</sup> years] | 0                                  | 58             | 1               |                         | 58                  | 1               |                         | 61                | 1               |                         | 90             | 1               |                         |
|                                                        | > 0 – 58.0                         | 13             | 1.18            | 0.61 2.28               | 16                  | 1.46            | 0.77 2.80               | 11                | 0.91            | 0.45 1.84               | 9              | <b>0.40</b>     | <b>0.19</b> <b>0.83</b> |
|                                                        | > 58.0 – 184.8                     | 6              | 1.14            | 0.45 2.90               | 1                   | 0.18            | 0.02 1.36               | 7                 | 1.28            | 0.53 3.09               | 4              | 0.41            | 0.14 1.18               |
|                                                        | > 184.8                            | 11             | <b>2.24</b>     | <b>1.06</b> <b>4.76</b> | 11                  | <b>2.54</b>     | <b>1.16</b> <b>5.57</b> | 11                | 2.03            | 0.95 4.31               | 12             | 1.18            | 0.59 2.38               |
| Iron status                                            | Normal                             | 73             | 1               |                         | 69                  | 1               |                         | 69                | 1               |                         | 104            | 1               |                         |
|                                                        | Hemoglobin < 13 g/dL               | 9              | 0.98            | 0.45 2.11               | 8                   | 0.92            | 0.40 2.13               | 14                | 1.85            | 0.94 3.61               | 9              | 0.77            | 0.36 1.63               |
|                                                        | Ferritin ≥ 400 µg/L                | 6              | 0.74            | 0.30 1.79               | 9                   | 1.38            | 0.63 3.04               | 7                 | 0.96            | 0.42 2.23               | 11             | 0.95            | 0.48 1.89               |
| Occupational qualification                             | University                         | 19             | 1               |                         | 22                  | 1               |                         | 19                | 1               |                         | 28             | 1               |                         |
|                                                        | Foremen/technician                 | 17             | 1.02            | 0.50 2.08               | 14                  | 0.81            | 0.38 1.71               | 18                | 1.11            | 0.54 2.26               | 19             | 0.91            | 0.48 1.71               |
|                                                        | None/vocational                    | 52             | 1.42            | 0.78 2.56               | 50                  | 1.26            | 0.70 2.29               | 53                | 1.53            | 0.84 2.77               | 77             | <b>1.64</b>     | <b>1.00</b> <b>2.68</b> |
| Age [per 10 years]                                     |                                    | 88             | <b>2.67</b>     | <b>1.89</b> <b>3.78</b> | 86                  | <b>3.50</b>     | <b>2.40</b> <b>5.10</b> | 90                | <b>2.87</b>     | <b>2.03</b> <b>4.07</b> | 124            | <b>1.63</b>     | <b>1.21</b> <b>2.18</b> |
| Smoking status                                         | Never                              | 23             | 1               |                         | 26                  | 1               |                         | 25                | 1               |                         | 35             | 1               |                         |
|                                                        | Former                             | 50             | 1.00            | 0.58 1.71               | 47                  | 0.87            | 0.50 1.51               | 51                | 0.89            | 0.52 1.51               | 66             | 0.93            | 0.59 1.47               |
|                                                        | Current                            | 15             | 1.89            | 0.90 3.93               | 13                  | 1.69            | 0.77 3.70               | 14                | 1.65            | 0.78 3.46               | 23             | 1.62            | 0.88 2.98               |
| Gamma-glutamyl transferase [U/L]                       | < 74 (90 <sup>th</sup> percentile) | 76             | 1               |                         | 74                  | 1               |                         | 79                | 1               |                         | 112            | 1               |                         |
|                                                        | ≥ 74                               | 12             | 1.58            | 0.80 3.13               | 12                  | 1.83            | 0.90 3.73               | 11                | 1.33            | 0.66 2.70               | 12             | 1.02            | 0.53 1.97               |
| Test time [sec]                                        |                                    |                |                 |                         | 86                  | <b>1.05</b>     | <b>1.03</b> <b>1.07</b> |                   |                 |                         | 124            | 1.05            | 0.99 1.11               |

<sup>a</sup>Participants at risk; <sup>b</sup>Odds ratio (OR) with 95% confidence interval (CI) as estimate of the relative risk for a substantially impaired dexterity (hits <10<sup>th</sup> percentile, errors >90<sup>th</sup> percentile).
